# Supplementary material
Source: publisher figshare collection journal article supplement (https://rs.figshare.com/ndownloader/files/27475259)
Supplement: Supplementary file 1 [file 27475259]

**Supplementary Material 1 from Loy et al ‘Developmental instability and phenotypic evolution in a small and isolated bear population’**

Table S1: Pairwise absolute differences between variances (below the diagonal) and p values (above the diagonal)

|  | Apennine | Kamčatka | Scandinavia |
| --- | --- | --- | --- |
| Apennine | 0 | 0.498 | 0.094 |
| Kamčatka | 0.0003094252 | 0 | 0.491 |
| Scandinavia | 0.0006163578 | 0.0003069327 | 0 |


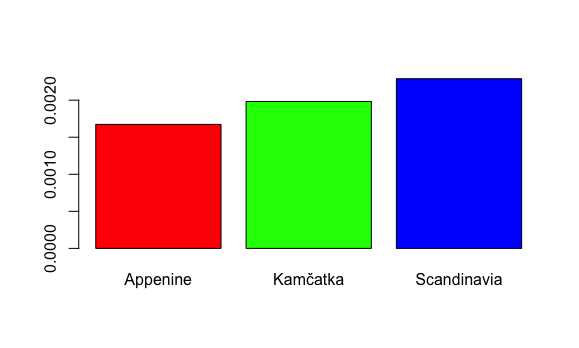


Figure S1: Barplot of the Procrustes variances for each group: Apennine=0.001673278, Kamčatka=0.001982703, Scandinavia=0.002289636

Table S2: Analysis of Variance of the FA component, using Residual Randomization (Number of permutations: 1000). Effect sizes (Z) based on F distributions

|  | Df | SS | MS | Rsq | F | Z | Pr(>F) |
| --- | --- | --- | --- | --- | --- | --- | --- |
| OTU | 2 | 0.0019683 | 0.00098413 | 0.07269 | 1.7636 | 2.7224 | 0.005 |
| Residuals | 45 | 0.0251103 | 0.00055801 | 0.92731 |  |  |  |
| Total | 47 | 0.0270786 |  |  |  |  |  |

Signif. codes: 0 ‘***’ 0.001 ‘**’ 0.01 ‘*’ 0.05 ‘.’ 0.1 ‘ ’ 1

Table S3: Pairwise comparisons of FA levels among groups, using Residual Randomization (Number of permutations: 1000).

|  | d | UCL (95%) | Z | Pr>d |
| --- | --- | --- | --- | --- |
| Apennine:Kamčatka | 0.01272984 | 0.01233313 | 2.005904 | 0.029 |
| Apennine:Scandinavia | 0.01124745 | 0.009654832 | 3.174727 | 0.003 |
| Kamčatka:Scandinavia | 0.01062913 | 0.011799012 | 0.874824 | 0.199 |

Table S4: Pairwise distances between FA variances, using Residual Randomization (Number of permutations: 1000)

|  | d | UCL (95%) | Z | Pr>d |
| --- | --- | --- | --- | --- |
| Apennine:Kamčatka | 2.34E-04 | 0.0002456872 | 14.631.218 | 0.058 |
| Apennine:Scandinavia | 2.96E-04 | 0.0001909835 | 24.059.603 | 0.001 |
| Kamčatka:Scandinavia | 6.19E-05 | 0.0002327689 | -0.3198046 | 0.632 |


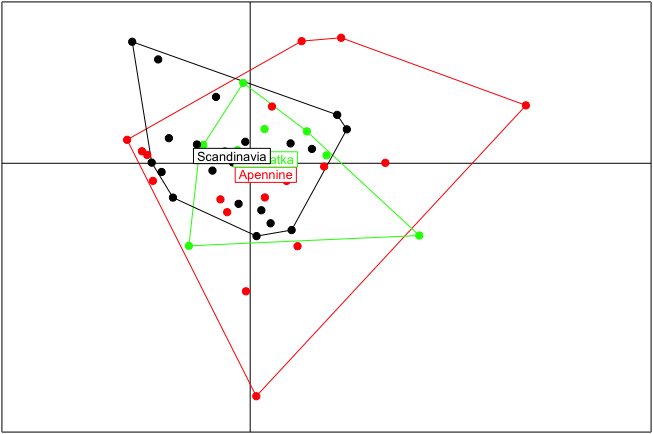


Figure S2: PCA on FA component


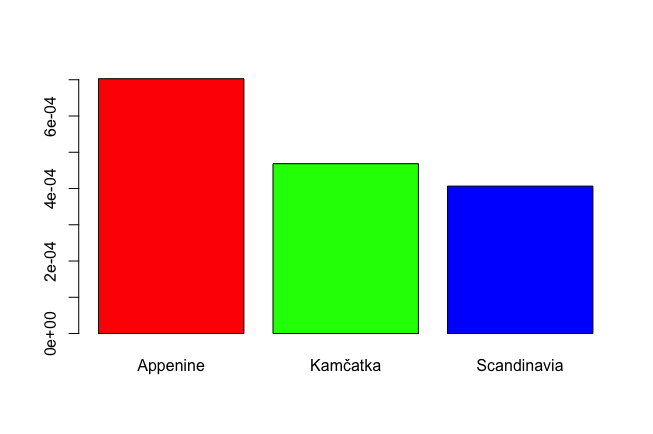


Figure S3: Procrustes variance of the FA component for each population (Apennine=0.00070; Kamčatka=0.00046; Scandinavia=0.00040)
